# Supplementary material for: Targeting Prohibitins to Inhibit Melanoma Growth and Overcome Resistance to Targeted Therapies
Source: MDPI journal article supplement (doi:10.3390/cells12141855), 2023-07-14
Supplement: s1 [file s1]

## Supplementary Tables

**Supplementary Table S1.** IC50 analyses of four different PHB ligands (MEL 9,41,56 and JI130) in four different melanoma lines with different mutation status.

| <b>Cell lines</b><br><b>PHB</b><br><b>ligands</b> | <b>HBL</b><br>KIT mut | <b>MM162</b><br>WT BRAF/WT NRAS | <b>MM074</b><br>BRAF mut | <b>MM165</b><br>NRAS mut |
|---------------------------------------------------|-----------------------|---------------------------------|--------------------------|--------------------------|
| MEL 9                                             | 10.6                  | 18.4                            | 7.1                      | 20.2                     |
| MEL 41                                            | 9.3                   | 13.5                            | 5.6                      | 16.8                     |
| <b>MEL 56</b>                                     | <b>6.1</b>            | <b>8.4</b>                      | <b>5.0</b>               | <b>13.0</b>              |
| <b>JI130</b>                                      | <b>0.1</b>            | <b>0.16</b>                     | <b>0.09</b>              | <b>0.13</b>              |

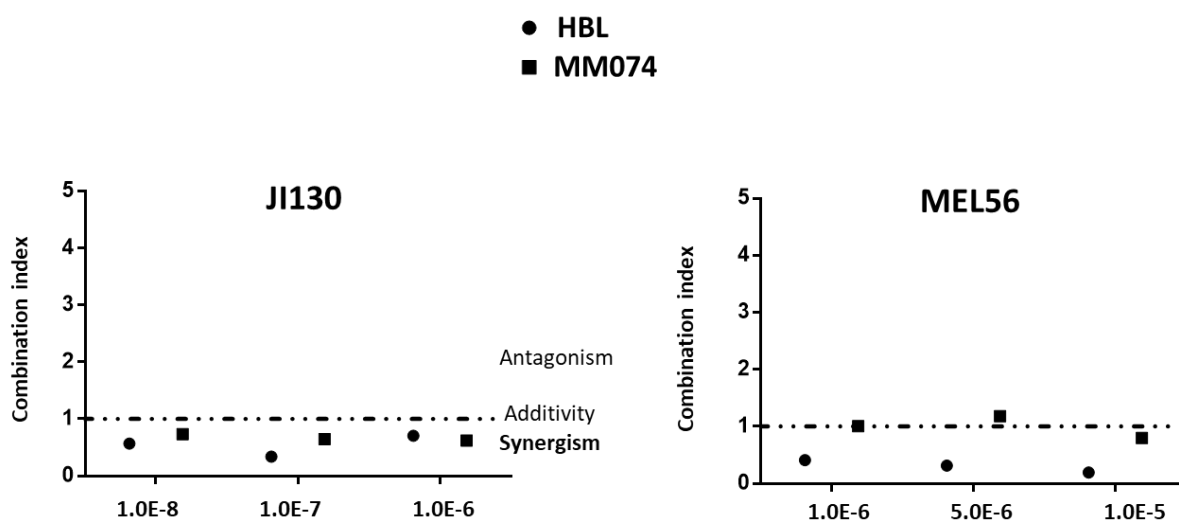

**Supplementary Figure S1: Combination of PHB ligands with the autophagy inhibitor chloroquine (CQ).** Combination index (CI) plots of the combination of PHB ligands (JI130) and MEL56 with CQ (25  $\mu$ M) in HBL and MM074 melanoma lines. CI < 1, CI = 1, and CI > 1 indicate synergism, additive effect, and antagonism, respectively.
